# Supplementary material for: Cultural Adaptation and Psychometric Properties of the Trust Me Scale—Italian Version: A Validation Study
Source: MDPI journal article supplement (doi:10.3390/healthcare11081086), 2023-04-11
Supplement: s1 [file s1]

# Cultural Adaptation and Psychometric Properties of the Trust Me Scale—Italian Version: A Validation Study

Dhurata Ivziku <sup>1</sup>, Rosario Caruso <sup>2,3</sup> Marzia Lommi<sup>\*4</sup>, Gianluca Conte <sup>2</sup>, Arianna Magon <sup>2</sup>, Alessandro Stievano<sup>5</sup>, Gennaro Rocco<sup>5</sup>, Ippolito Notarnicola<sup>5</sup>, Maddalena De Maria<sup>6</sup>, Raffaella Gualandi<sup>1</sup>, Daniela Tartaglini<sup>1</sup> and Anna De Benedictis<sup>1,7</sup>

**Table S1.** Trust Me Scale Italian-Nurse Version

|    | Le seguenti affermazioni valutano la <b>fiducia tra gruppo e coordinatore</b> . Indichi quale risposta rappresenta al meglio la sua opinione. | Fortemente in disaccordo | In disaccordo | Neutrale | D' accordo | Fortemente d' accordo |
|----|-----------------------------------------------------------------------------------------------------------------------------------------------|--------------------------|---------------|----------|------------|-----------------------|
| 1  | I bisogni e i desideri del gruppo sono molto importanti per il coordinatore.                                                                  | 1                        | 2             | 3        | 4          | 5                     |
| 2  | Posso contare sul mio coordinatore per aiutarmi se sono in difficoltà con il lavoro.                                                          | 1                        | 2             | 3        | 4          | 5                     |
| 3  | Il coordinatore non farebbe consapevolmente nulla per danneggiare l'azienda.                                                                  | 1                        | 2             | 3        | 4          | 5                     |
| 4  | Il mio coordinatore è aperto e sincero con me.                                                                                                | 1                        | 2             | 3        | 4          | 5                     |
| 6  | Il coordinatore mantiene gli impegni presi.                                                                                                   | 1                        | 2             | 3        | 4          | 5                     |
| 7  | Il coordinatore sta davvero attento a ciò che è importante per il gruppo.                                                                     | 1                        | 2             | 3        | 4          | 5                     |
| 8  | Il coordinatore è consapevole del lavoro che deve essere svolto.                                                                              | 1                        | 2             | 3        | 4          | 5                     |
| 9  | Il coordinatore è noto per avere successo nelle cose che tenta di realizzare.                                                                 | 1                        | 2             | 3        | 4          | 5                     |
| 10 | Se commetto un errore, il mio coordinatore è disposto a "perdonare e dimenticare".                                                            | 1                        | 2             | 3        | 4          | 5                     |
| 12 | Il coordinatore intraprende azioni coerenti con gli impegni assunti.                                                                          | 1                        | 2             | 3        | 4          | 5                     |
| 14 | C'è molto calore nelle relazioni tra i coordinatori e i lavoratori di questa organizzazione.                                                  | 1                        | 2             | 3        | 4          | 5                     |
| 15 | Il coordinatore farebbe sacrifici personali per il nostro gruppo.                                                                             | 1                        | 2             | 3        | 4          | 5                     |
| 16 | Il coordinatore esprime i suoi veri sentimenti su questioni importanti.                                                                       | 1                        | 2             | 3        | 4          | 5                     |

**Table S2.** Trust Me Scale Italian-Nurse manager Version

|    | Le seguenti affermazione valutano la <b>fiducia tra gruppo e leader</b> . Indichi quale risposta rappresenta al meglio la sua opinione. | Fortemente in disaccordo | In disaccordo | Neutrale | D' accordo | Fortemente d' accordo |
|----|-----------------------------------------------------------------------------------------------------------------------------------------|--------------------------|---------------|----------|------------|-----------------------|
| 1  | I bisogni e i desideri del gruppo sono molto importanti per il coordinatore.                                                            | 1                        | 2             | 3        | 4          | 5                     |
| 2  | Posso contare sul mio gruppo per aiutarmi se sono in difficoltà con il lavoro.                                                          | 1                        | 2             | 3        | 4          | 5                     |
| 3  | Il gruppo non farebbe consapevolmente nulla per danneggiare l'azienda.                                                                  | 1                        | 2             | 3        | 4          | 5                     |
| 4  | I mio gruppo è aperto e sincero con me.                                                                                                 | 1                        | 2             | 3        | 4          | 5                     |
| 6  | Il gruppo mantiene gli impegni presi.                                                                                                   | 1                        | 2             | 3        | 4          | 5                     |
| 7  | Il gruppo sta davvero attento a ciò che è importante per il coordinatore.                                                               | 1                        | 2             | 3        | 4          | 5                     |
| 8  | Il gruppo è consapevole del lavoro che deve essere svolto.                                                                              | 1                        | 2             | 3        | 4          | 5                     |
| 9  | Il gruppo è noto per avere successo nelle cose che tenta di realizzare.                                                                 | 1                        | 2             | 3        | 4          | 5                     |
| 10 | Se commetto un errore, il mio gruppo è disposto a "perdonare e dimenticare".                                                            | 1                        | 2             | 3        | 4          | 5                     |
| 12 | Il gruppo intraprende azioni coerenti con gli impegni assunti.                                                                          | 1                        | 2             | 3        | 4          | 5                     |
| 14 | C'è molto calore nelle relazioni tra i coordinatori e i lavoratori di questa azienda.                                                   | 1                        | 2             | 3        | 4          | 5                     |
| 15 | I dipendenti farebbero sacrifici personali per il nostro gruppo.                                                                        | 1                        | 2             | 3        | 4          | 5                     |
| 16 | Il gruppo esprime i suoi veri sentimenti su questioni importanti.                                                                       | 1                        | 2             | 3        | 4          | 5                     |
